# Supplementary material for: Diagnostic Algorithm in the Management of Acute Febrile Abdomen in Patients with Autosomal Dominant Polycystic Kidney Disease
Source: PubMed Central journal article supplement (PMC4987061; doi:10.1371/journal.pone.0161277), 2016-08-16
Supplement: pone.0161277.s002.pdf [file pone.0161277.s002.pdf]

|     | Age | Gender (0=F) | Dialysis | KTR | eGFR (ml/min) | T°>38°C | Pain | WBC (x1000/mm <sup>3</sup> ) | CRP (mg/L) | Hematuria | Leucocyturia | Germ ID urines |
|-----|-----|--------------|----------|-----|---------------|---------|------|------------------------------|------------|-----------|--------------|----------------|
| CyH | 51  | 0            | 0        | 0   | 32            | 0       | 1    | 7.1                          | 25         | 0         | 0            | 0              |
| CyH | 45  | 0            | 0        | 0   | 51            | 0       | 1    | 8.44                         | 1          | 1         | 0            | 0              |
| CyH | 44  | 1            | 0        | 1   | 98            | 0       | 0    | 10.84                        | 1          | 1         | 1            | 1              |
| CyH | 42  | 1            | 0        | 0   | 56            | 0       | 1    | 11.11                        | 21         | 0         | 0            | 0              |
| CyH | 41  | 1            | 0        | 0   | 145           | 0       | 1    | 6.8                          | 1          | 1         | 0            | 0              |
| CyH | 42  | 1            | 0        | 0   | 150           | 0       | 1    | 15.7                         | 11         | 0         | 0            | 0              |
| CyH | 42  | 1            | 0        | 0   | 126           | 0       | 1    | 7.5                          | 2          | 0         | 0            | 0              |
| CyH | 45  | 1            | 0        | 0   | 151           | 0       | 1    | 5.37                         | 2          | 0         | 0            | 0              |
| CyH | 45  | 1            | 0        | 0   | 155           | 0       | 1    | 13.23                        | 28         | 0         | 0            | 0              |
| CyH | 56  | 0            | 0        | 1   | 92            | 0       | 1    | 9.85                         | 62         | 1         | 1            | 1              |
| CyH | 39  | 1            | 0        | 1   | 50            | 0       | 1    | 6.8                          | 25         | 1         | 1            | 0              |
| CyH | 66  | 0            | 0        | 1   | 23            | 0       | 1    | 11.67                        | 34         | 0         | 0            | 0              |
| CyH | 55  | 0            | 0        | 0   | 56            | 0       | 1    | 6.42                         | 16         | 1         | 0            | 1              |
| CyH | 66  | 1            | 0        | 0   | 19            | 1       | 1    | 15.72                        | 1          | 0         | 0            | 0              |
| CyH | 81  | 0            | 0        | 0   | 28            | 0       | 1    | 14.18                        | 10         | 0         | 0            | 0              |
| CyH | 49  | 0            | 0        | 0   | 47            | 0       | 1    | 11.29                        | 12         | 0         | 0            | 0              |
| CyH | 38  | 0            | 0        | 1   | 38            | 0       | 1    | 5.32                         | 1          | 0         | 0            | 0              |
| CyH | 55  | 0            | 0        | 0   | 28            | 0       | 1    | 7.77                         | 13         | 0         | 0            | 0              |
| CyH | 32  | 1            | 0        | 0   | 157           | 0       | 1    | 12.99                        | 5          | 0         | 0            | 0              |
| CyH | 36  | 1            | 0        | 0   | 123           | 0       | 1    | 14.64                        | 7          | 0         | 0            | 0              |
| CyH | 50  | 0            | 0        | 0   | 44            | 0       | 1    | 13.1                         | 6          | 0         | 0            | 0              |
| CyH | 47  | 1            | 0        | 0   | 134           | 0       | 1    | 13.45                        | 1          | 0         | 0            | 0              |
| CyH | 63  | 1            | 0        | 0   | 21            | 0       | 1    | 10.17                        | 38         | 1         | 0            | 0              |
| CyH | 63  | 1            | 0        | 0   | 19            | 0       | 1    | 8.29                         | 8          | 0         | 0            | 0              |
| CyH | 26  | 1            | 0        | 0   | 43            | 0       | 1    | 9.58                         | 14         | 0         | 0            | 0              |
| CyH | 27  | 1            | 0        | 0   | 19            | 0       | 1    | 9.88                         | 5          | 0         | 0            | 0              |
| CyH | 31  | 0            | 0        | 0   | 96            | 0       | 1    | 4.86                         | 24         | 0         | 0            | 0              |
| CyH | 32  | 0            | 0        | 0   | 111           | 0       | 1    | 5.87                         | 3          | 0         | 0            | 0              |
| CyH | 33  | 0            | 0        | 0   | 107           | 0       | 1    | 7.16                         | 24         | 0         | 0            | 0              |
| CyH | 35  | 0            | 0        | 0   | 100           | 1       | 1    | 5.83                         | 1          | 0         | 0            | 0              |

|           |    |   |   |   |     |   |   |       |     |   |   |   |
|-----------|----|---|---|---|-----|---|---|-------|-----|---|---|---|
| Renal Cyl | 37 | 1 | 0 | 0 | 12  | 1 | 1 | 8.32  | 99  | 1 | 1 | 0 |
| Renal Cyl | 61 | 1 | 1 | 0 |     | 1 | 1 | 7.49  | 63  | 0 | 0 | 0 |
| Renal Cyl | 38 | 1 | 0 | 1 | 52  | 1 | 1 | 11.7  | 204 | 0 | 0 | 0 |
| Renal Cyl | 56 | 0 | 0 | 1 | 34  | 1 | 0 | 10.74 | 119 | 0 | 0 | 0 |
| Renal Cyl | 68 | 0 | 0 | 0 | 56  | 1 | 1 | 19.26 | 305 | 0 | 1 | 1 |
| Renal Cyl | 54 | 1 | 0 | 0 | 46  | 1 | 1 | 11.7  | 78  | 0 | 0 | 0 |
| Renal Cyl | 50 | 1 | 0 | 1 | 37  | 1 | 1 | 10.05 | 273 | 1 | 1 | 0 |
| Renal Cyl | 56 | 0 | 0 | 0 | 62  | 1 | 1 | 8.34  | 206 | 0 | 0 | 0 |
| Renal Cyl | 60 | 0 | 0 | 1 | 22  | 1 | 1 | 9.21  | 251 | 1 | 1 | 1 |
| Renal Cyl | 19 | 0 | 0 | 0 | 124 | 1 | 1 | 13.26 | 127 | 0 | 0 | 0 |
| Renal Cyl | 53 | 0 | 1 | 0 |     | 1 | 1 | 8.27  | 703 | 1 | 1 | 1 |
| Renal Cyl | 54 | 0 | 0 | 1 | 45  | 1 | 1 | 10.84 | 328 | 1 | 1 | 1 |
| Renal Cyl | 55 | 0 | 0 | 1 | 49  | 1 | 1 | 17.4  | 217 | 0 | 1 | 1 |
| Renal Cyl | 36 | 1 | 0 | 0 | 15  | 1 | 1 | 6.46  | 11  | 0 | 0 | 0 |
| Renal Cyl | 51 | 1 | 1 | 0 |     | 1 | 1 | 11.68 | 133 | 0 | 0 | 0 |
| Renal Cyl | 33 | 1 | 0 | 0 | 129 | 1 | 1 | 10.23 | 79  | 0 | 0 | 0 |
| Renal Cyl | 65 | 0 | 0 | 0 | 41  | 1 | 1 | 12.24 | 463 | 1 | 0 | 0 |
| Liver Cyl | 66 | 1 | 1 | 1 |     | 1 | 1 | 9.53  | 150 | 0 | 0 | 0 |
| Liver Cyl | 66 | 1 | 0 | 1 | 13  | 1 | 1 | 12.17 | 173 | 0 | 1 | 0 |
| Liver Cyl | 66 | 0 | 0 | 0 | 36  | 1 | 1 | 11.05 | 341 | 0 | 0 | 0 |
| Liver Cyl | 56 | 0 | 0 | 1 | 39  | 1 | 1 | 15.58 | 256 | 1 | 0 | 0 |
| Liver Cyl | 66 | 0 | 0 | 1 | 38  | 1 | 1 | 4.25  | 51  | 0 | 0 | 0 |
| Liver Cyl | 66 | 1 | 1 | 1 |     | 1 | 1 | 6.5   | 342 | 0 | 0 | 0 |
| IUO       | 69 | 0 | 0 | 1 | 44  | 1 | 1 | 6.28  | 15  | 1 | 1 | 0 |
| IUO       | 65 | 0 | 0 | 1 | 36  | 1 | 0 | 2.82  | 28  | 1 | 0 | 0 |
| IUO       | 63 | 0 | 0 | 1 | 40  | 0 | 0 | 7.71  | 132 | 0 | 1 | 1 |
| IUO       | 49 | 0 | 0 | 1 | 135 | 0 | 0 | 11.52 | 39  | 1 | 0 | 1 |
| IUO       | 37 | 1 | 0 | 0 | 19  | 0 | 1 | 4.37  | 32  | 0 | 0 | 0 |
| IUO       | 32 | 1 | 0 | 1 | 12  | 0 | 0 | 22.97 | 151 | 0 | 0 | 1 |
| IUO       | 46 | 1 | 0 | 1 | 42  | 1 | 0 | 12.47 | 250 | 1 | 1 | 0 |
| IUO       | 32 | 1 | 0 | 0 | 142 | 1 | 1 | 11.96 | 38  | 0 | 0 | 0 |

|     |    |   |    |   |    |   |   |       |     |   |   |   |
|-----|----|---|----|---|----|---|---|-------|-----|---|---|---|
| IUO | 76 | 0 | 0  | 1 | 34 | 0 | 0 | 13.07 | 253 | 0 | 1 | 0 |
| IUO | 64 | 0 | 0  | 1 | 53 | 0 | 0 | 13.41 | 214 | 1 | 1 | 0 |
| IUO | 78 | 1 | 0  | 1 | 28 | 1 | 0 | 11.14 | 145 | 0 | 0 | 0 |
| IUO | 68 | 0 | 0  | 1 | 45 | 0 | 1 | 5.8   | 17  | 0 | 0 | 1 |
| IUO | 30 | 0 | 0  | 0 | 97 | 0 | 1 | 9.93  | 47  | 0 | 1 | 1 |
| IUO | 31 | 0 | 0  | 0 | 56 | 1 | 1 | 18.1  | 386 | 0 | 1 | 1 |
| IUO | 56 | 0 | 0  | 1 | 43 | 1 | 1 | 11.94 | 163 | 0 | 1 | 0 |
| IUO | 49 | 0 | 0  | 0 | 37 | 0 | 1 | 10.35 | 108 | 1 | 1 | 1 |
| IUO | 59 | 1 | 0  | 0 | 19 | 0 | 1 | 10.4  | 68  | 0 | 0 | 0 |
| IUO | 57 | 1 | 0  | 1 | 80 | 1 | 0 | 13.5  | 25  | 0 | 1 | 0 |
| IUO | 64 | 1 | 0  | 1 | 55 | 1 | 1 | 18.23 | 6   | 1 | 1 | 1 |
| IUO | 58 | 1 | 0  | 1 | 48 | 1 | 1 | 21.12 | 53  | 1 | 1 | 1 |
| IUO | 24 | 0 | 0  | 0 | 85 | 1 | 1 | 5.22  | 89  | 0 | 0 | 0 |
| IUO | 48 | 1 | HD | 0 | 4  | 0 | 1 | 7.73  | 165 | 1 | 1 | 0 |
| IUO | 56 | 1 | 0  | 0 | 41 | 1 | 0 | 6.52  | 208 | 1 | 1 | 1 |
| IUO | 75 | 1 | 0  | 1 | 29 | 1 | 1 | 19.52 | 71  | 1 | 1 | 1 |
| IUO | 72 | 1 | 0  | 1 | 38 | 1 | 1 | 12.29 | 26  | 0 | 0 | 0 |
| IUO | 57 | 0 | 0  | 1 | 31 | 1 | 1 | 9.93  | 30  | 0 | 1 | 0 |
| IUO | 58 | 0 | 0  | 1 | 30 | 1 | 1 | 7.64  | 78  | 0 | 0 | 0 |
| IUO | 55 | 0 | 0  | 1 | 36 | 1 | 1 | 9.2   | 50  | 0 | 1 | 1 |
| IUO | 35 | 1 | DP | 0 |    | 0 | 1 | 8.45  | 22  | 1 | 0 | 0 |
| IUO | 48 | 1 | 0  | 1 | 48 | 1 | 1 | 14.6  | 66  | 1 | 1 | 1 |
| IUO | 47 | 1 | 0  | 1 | 21 | 1 | 1 | 10.62 | 50  | 0 | 1 | 1 |
| IUO | 65 | 0 | 0  | 0 | 51 | 1 | 1 | 24.34 | 17  | 0 | 0 | 0 |
| IUO | 69 | 0 | 0  | 1 | 26 | 1 | 1 | 6.81  | 42  | 0 | 0 | 1 |
| IUO | 84 | 0 | 0  | 0 | 17 | 1 | 0 | 23.92 | 278 | 0 | 1 | 1 |
| IUO | 44 | 1 | 0  | 1 | 88 | 1 | 0 | 10.48 | 60  | 0 | 1 | 1 |



|             |   |                  |          |
|-------------|---|------------------|----------|
|             | 1 | S.capitis        | positive |
|             | 0 |                  |          |
|             | 0 |                  |          |
|             | 1 | E.coli           |          |
| E.coli      | 1 | S.epidermidis    |          |
|             | 0 |                  | positive |
|             | 1 | E.coli           | positive |
|             | 0 |                  |          |
| E.coli      | 0 |                  |          |
|             | 1 | E.coli           |          |
| E.coli      | 1 | Ecoli            |          |
| E.coli      | 0 |                  | positive |
| E.coli      | 0 |                  |          |
|             | 0 |                  | positive |
|             | 0 |                  | positive |
|             | 0 |                  |          |
|             | 0 |                  | negative |
|             | 1 | E.coli           |          |
|             | 0 |                  |          |
|             | 0 |                  | positive |
|             | 1 | E.coli           |          |
|             | 0 |                  | negative |
|             | 1 | E.coli, E.durans | positive |
|             | 0 |                  |          |
|             | 0 |                  | negative |
| E.coli      | 1 | S.epidermidis    | negative |
| E.coli      | 0 |                  |          |
|             | 0 |                  |          |
| P.mirabilis | 0 |                  |          |
|             | 0 |                  | positive |
|             | 0 |                  |          |

|              |   |              |                  |
|--------------|---|--------------|------------------|
|              | 0 |              |                  |
|              | 0 |              | positive         |
|              | 0 |              |                  |
| E.coli       | 0 |              |                  |
| C.koseri     | 0 |              |                  |
| E.coli       | 0 |              |                  |
|              | 1 | E.coli       | negative         |
| E.coli       | 0 |              |                  |
|              | 0 |              |                  |
|              | 0 |              | positive (other) |
| E.coli       | 0 |              | negative         |
| E.coli       | 1 | E.coli       |                  |
|              | 0 |              |                  |
|              | 0 |              | negative         |
| S.aureus     | 1 | S.aureus     |                  |
| E.fecalis    | 0 |              | negative         |
|              | 1 | K.pneumoniae | positive (other) |
|              | 0 |              | negative         |
|              | 0 |              | negative         |
| K.pneumoniae | 0 |              | positive (other) |
|              | 0 |              | negative         |
| E.coli       | 1 | E.coli       |                  |
| E.coli       | 1 | E.coli       | positive (other) |
|              | 0 |              |                  |
| E.coli       | 0 |              | positive (other) |
| E.coli       | 0 |              |                  |
| K.pneumoniae | 1 | K.pneumoniae | negative         |
